# Supplementary material for: Dosimetric and feasibility evaluation of a CBCT‐based daily adaptive radiotherapy protocol for locally advanced cervical cancer
Source: PubMed Central journal article supplement (PMC9859994; doi:10.1002/acm2.13783), 2022-10-08

# OAR Metrics

## True Bowel V45

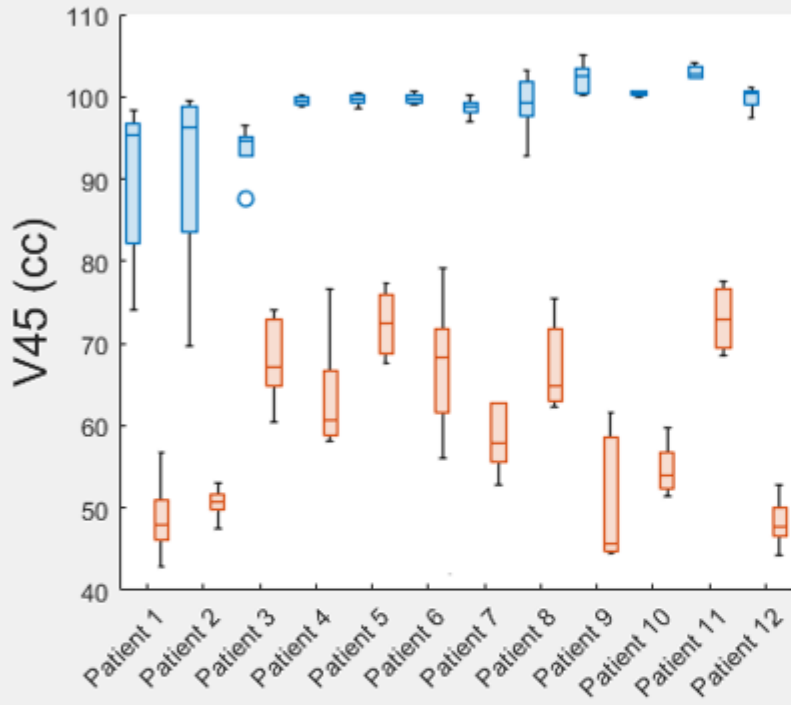

## True Bowel V40

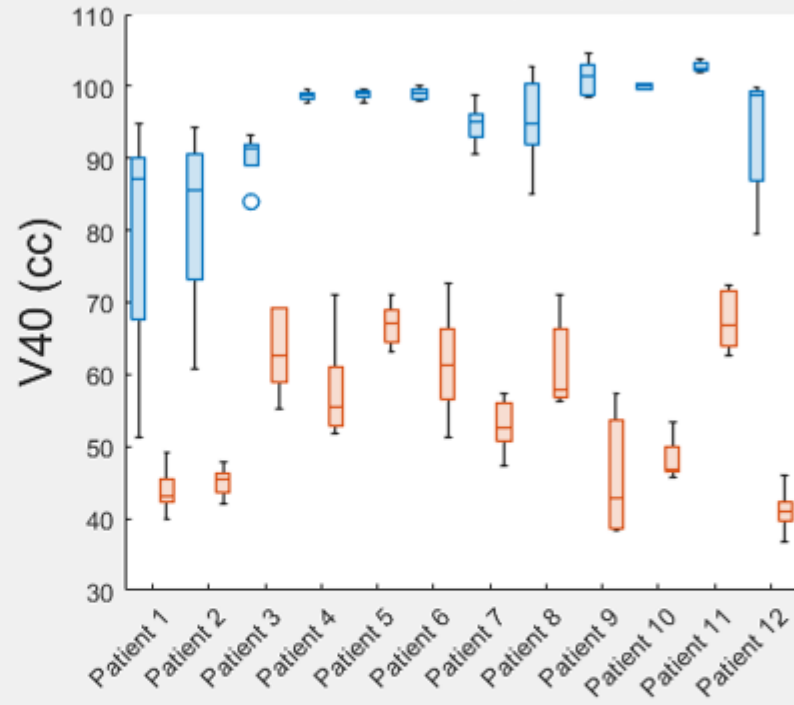

## D50 Rectum

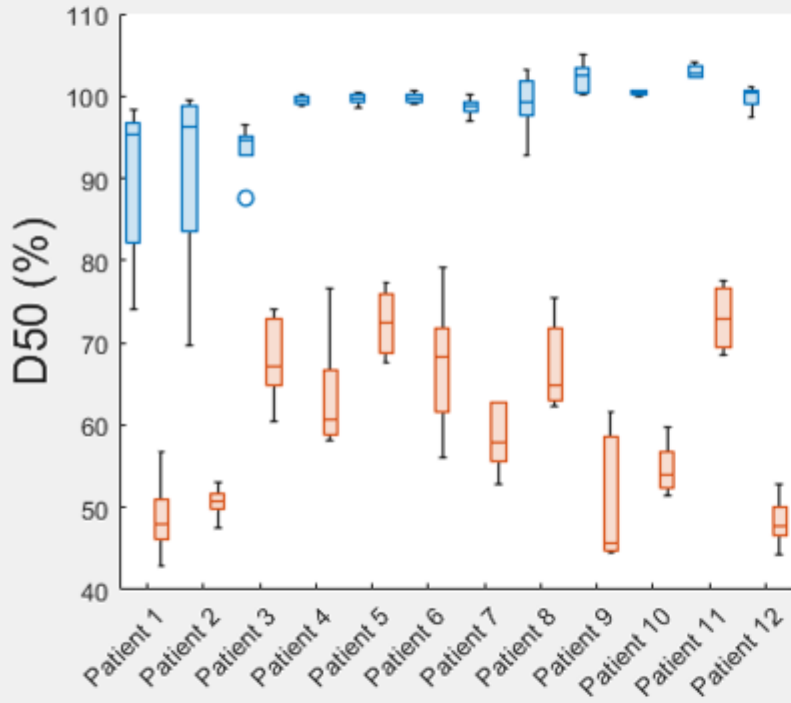

## D50 Bladder

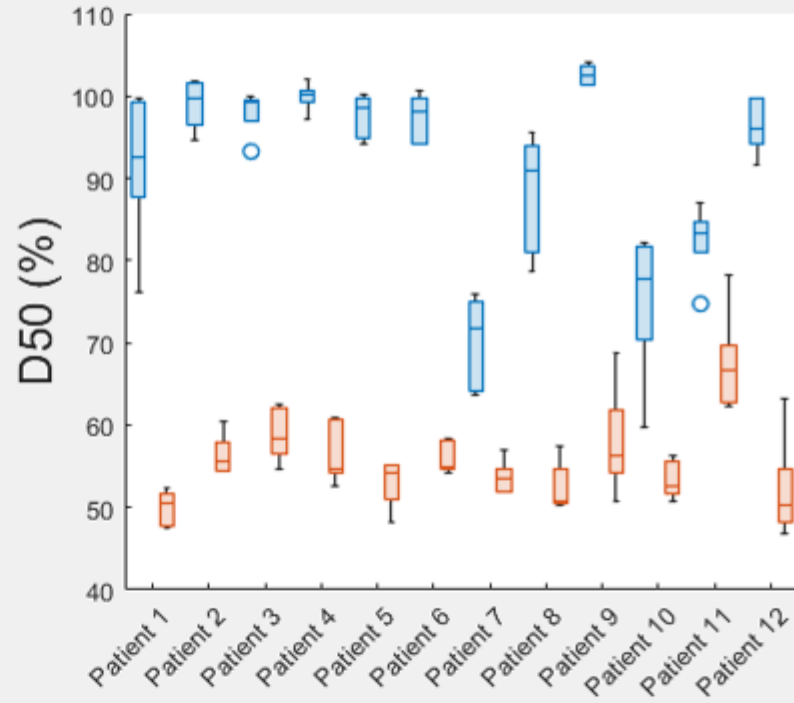

○ SOC  
○ Adapted

## D99 CTV

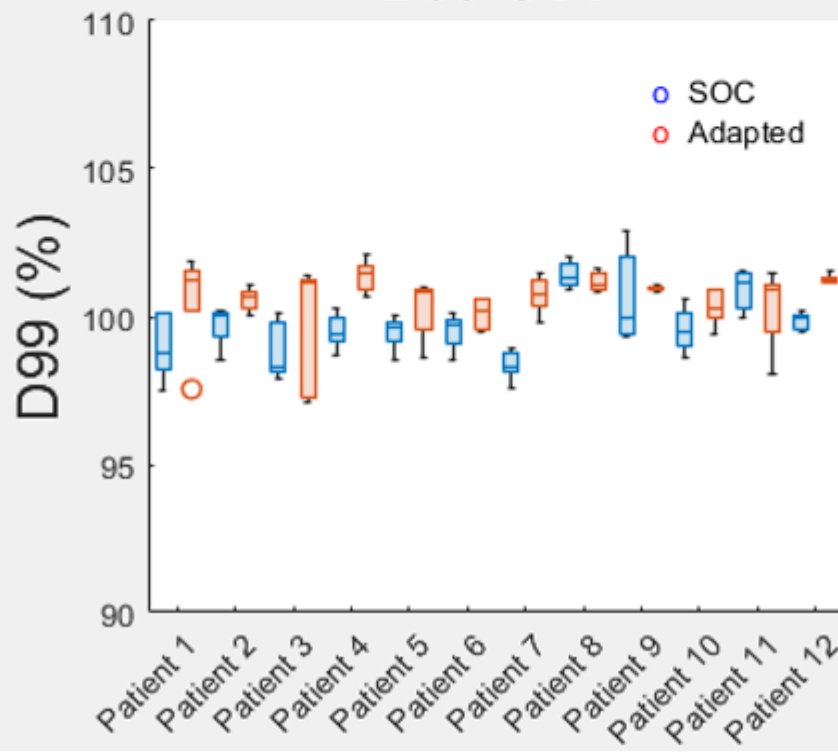

Supplement: ACM2-24-e13783-s001.pdf [file ACM2-24-e13783-s001.pdf]
